# Supplementary material for: A Strategic Approach for Prioritizing Research and Action to Prevent Suicide
Source: Atypon-hosted journal article supplement (doi:10.1176/appi.ps.201100512), 2013-01-01
Supplement: 71_ds001.pdf [file 71_ds001.pdf]

Online Appendix

Figure A: Conceptual Approach for Prioritizing Research and Action to Prevent Suicide

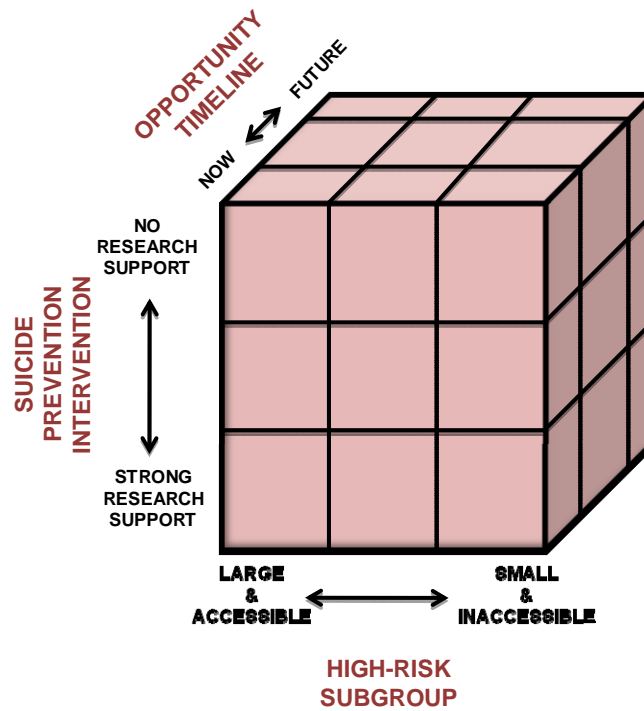

Figure B: Substance Use Treatment Facility as Intervention Platform

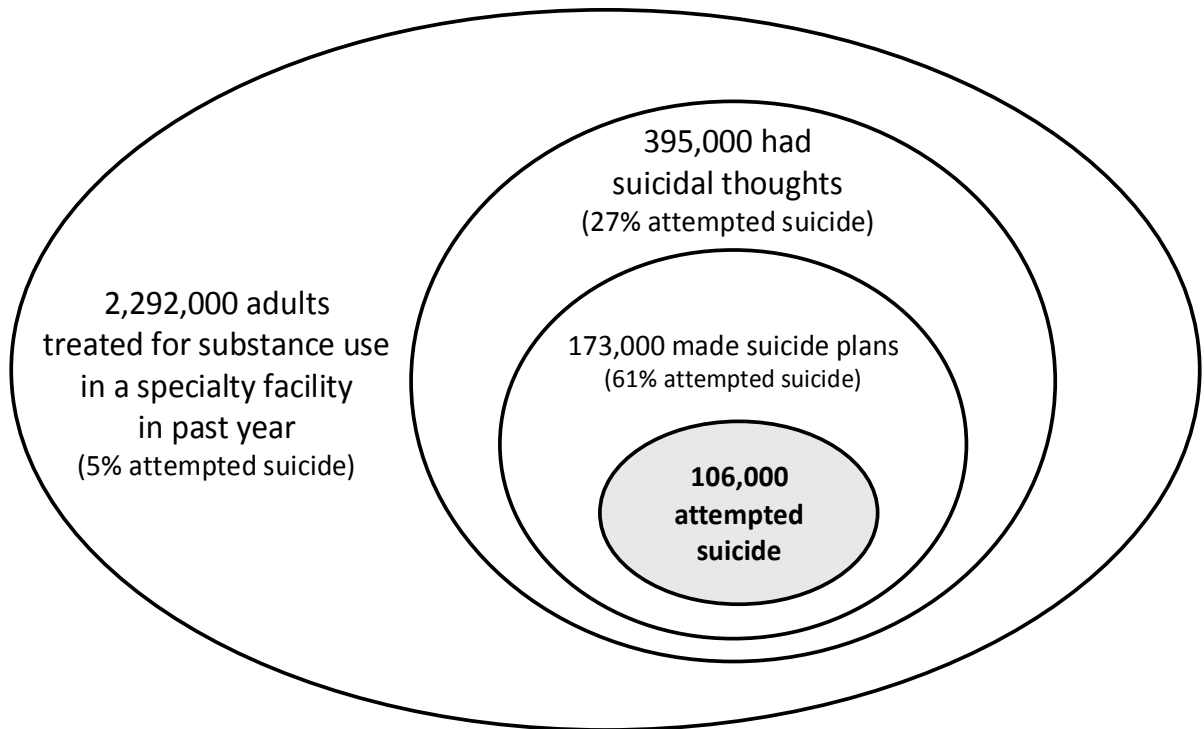

Data Source:  
SAMHSA 2008-2009 NSDUH

Figure C: Suicidal Thoughts and Serious Mental Illness as Targeting Factors

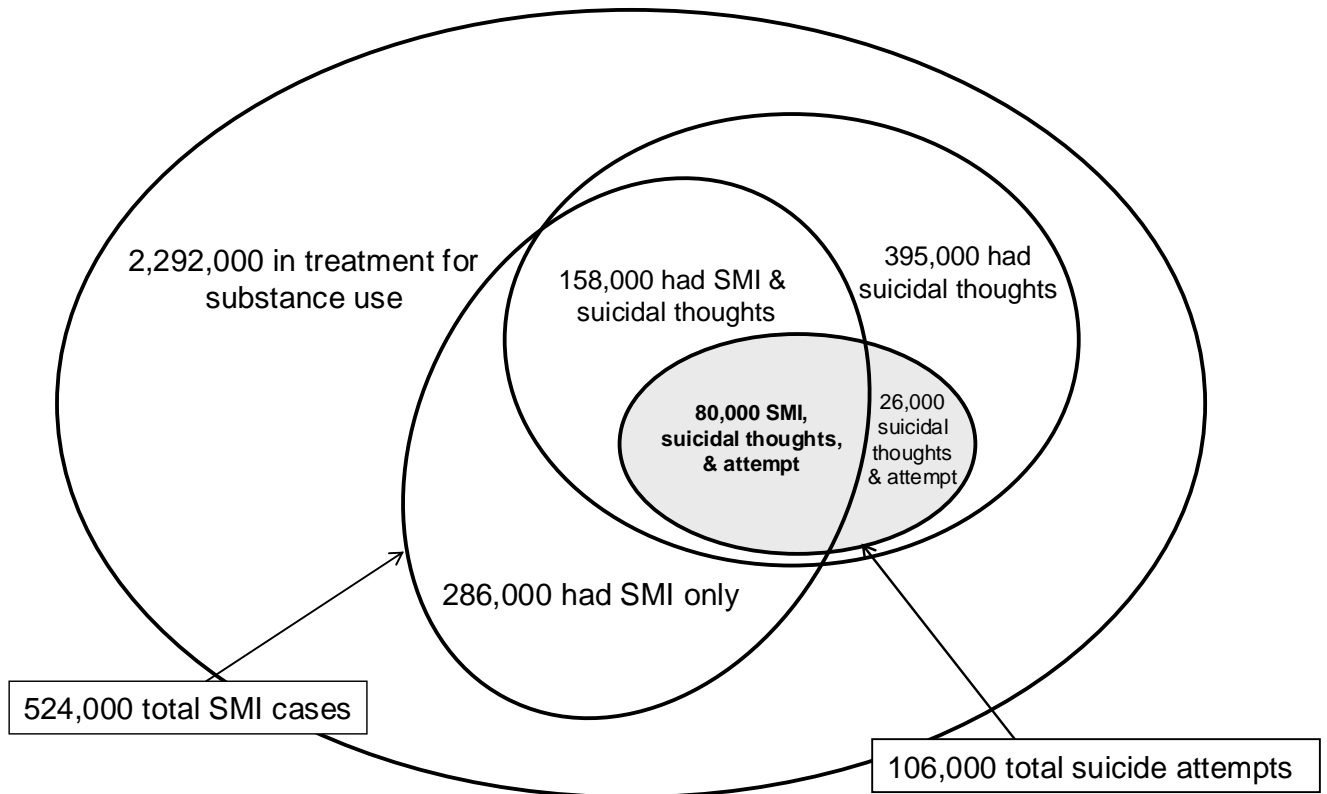

Data Source:  
SAMHSA 2008-2009 NSDUH

**Table 1**  
**Estimated Number of Suicide Deaths Averted**  
**with CBT Follow-up Care in Emergency Departments**

|                                                                                                                         |                     |
|-------------------------------------------------------------------------------------------------------------------------|---------------------|
| <b><u>NSDUH Data</u></b>                                                                                                |                     |
| # Adults treated in an emergency department for any reason in the past year                                             | 16,816,000          |
| # Reporting suicide attempt in past year = 686,000                                                                      | 686,000             |
| <b><u>Application of Brown et al findings to estimate suicide reattempt</u></b>                                         |                     |
| Group A: # Reattempts expected within 18 months after usual follow-up care (.416 x 686,000)                             | 285,376             |
| Group B: # Reattempts expected within 18 months after CBT follow-up care (.241 x 686,000)                               | 165,326             |
| <b><u>Application of Owens et al &amp; Brown et al findings to estimate suicide deaths</u></b>                          |                     |
| Group A: # Deaths expected within 12 months after reattempt (.01 x 285,376) (.02 x 285,376)                             | 2,854 - 5,708       |
| Group B: # Deaths expected within 12 months after reattempt (.01 x 165,326) (.02 x 165,326)                             | 1,653 - 3,307       |
| <b><u>Range of potential # of suicide deaths averted through CBT follow-up care in emergency departments (1-2%)</u></b> |                     |
| (2,854 - 1,653 = 1,201)<br>(5,708 - 3,307 = 2,401)                                                                      | <b>1,201- 2,401</b> |
